# Supplementary material
Source: Springer Nature journal article supplement (https://www.springerprofessional.de/resource/supplementary/13638_2012_544_MOESM3_ESM.pdf/11898030)

# TMS320C6416 DSP

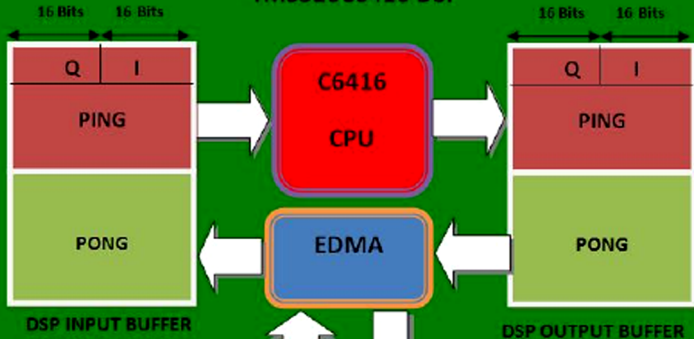

FPGA

ADC

DAC

FIFO

FIFO

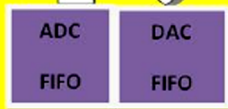

Supplement: MOESM3 [file 11898030]
